# Supplementary material for: Differential Expression and Localization of EHBP1L1 during the First Wave of Rat Spermatogenesis Suggest Its Involvement in Acrosome Biogenesis
Source: MDPI journal article supplement (doi:10.3390/biomedicines10010181), 2022-01-16
Supplement: s1 [file s1]

A

IIENESKGQRKVLATAEVDLARHAGPVPVQVPVRLRLKPKSVKVVQAELSL  
TLSGVLLREGRATDDDMQSLASLMSVKPSDVGNLDDFAESDEDEAHGPG

B

| Description                                                                | Scientific Name                   | Max Score | Total Score | Query Cover | E value | Per. Ident | Acc. Len | Accession                      |
|----------------------------------------------------------------------------|-----------------------------------|-----------|-------------|-------------|---------|------------|----------|--------------------------------|
| ✓ EH domain-binding protein 1-like protein 1 isoform 4 (Rattus norvegicus) | <a href="#">Rattus norvegicus</a> | 184       | 184         | 100%        | 2e-55   | 91.00%     | 762      | <a href="#">NP_001257634.1</a> |
| ✓ EH domain-binding protein 1-like protein 1 isoform 1 (Rattus norvegicus) | <a href="#">Rattus norvegicus</a> | 184       | 184         | 100%        | 3e-55   | 91.00%     | 774      | <a href="#">NP_001020288.2</a> |
| ✓ EH domain-binding protein 1-like protein 1 isoform 2 (Rattus norvegicus) | <a href="#">Rattus norvegicus</a> | 184       | 184         | 100%        | 6e-55   | 91.00%     | 1699     | <a href="#">NP_001123469.1</a> |
| ✓ rCG47454_isoform CRA_b (Rattus norvegicus)                               | <a href="#">Rattus norvegicus</a> | 184       | 184         | 100%        | 6e-55   | 91.00%     | 877      | <a href="#">EDM12523.1</a>     |
| ✓ EH domain-binding protein 1-like protein 1 isoform 3 (Rattus norvegicus) | <a href="#">Rattus norvegicus</a> | 183       | 183         | 100%        | 9e-55   | 91.00%     | 939      | <a href="#">NP_001257633.1</a> |
| ✓ EH domain-binding protein 1 (Rattus norvegicus)                          | <a href="#">Rattus norvegicus</a> | 90.5      | 90.5        | 85%         | 5e-22   | 58.14%     | 1202     | <a href="#">NP_001292059.1</a> |
| ✓ EH domain binding protein 1 (predicted) (Rattus norvegicus)              | <a href="#">Rattus norvegicus</a> | 90.5      | 90.5        | 85%         | 6e-22   | 58.14%     | 1146     | <a href="#">EDL97964.1</a>     |

C

| Description                                                           | Scientific Name              | Max Score | Total Score | Query Cover | E value | Per. Ident | Acc. Len | Accession                      |
|-----------------------------------------------------------------------|------------------------------|-----------|-------------|-------------|---------|------------|----------|--------------------------------|
| ✓ EH domain-binding protein 1-like protein 1 isoform 2 (Homo sapiens) | <a href="#">Homo sapiens</a> | 199       | 199         | 100%        | 2e-60   | 100.00%    | 765      | <a href="#">NP_001338016.1</a> |
| ✓ EH domain-binding protein 1-like protein 1 isoform 1 (Homo sapiens) | <a href="#">Homo sapiens</a> | 201       | 201         | 100%        | 3e-60   | 100.00%    | 1523     | <a href="#">NP_001092879.1</a> |
| ✓ hCG23295 (Homo sapiens)                                             | <a href="#">Homo sapiens</a> | 199       | 199         | 100%        | 8e-60   | 99.00%     | 1508     | <a href="#">EAW74410.1</a>     |
| ✓ hypothetical protein (Homo sapiens)                                 | <a href="#">Homo sapiens</a> | 199       | 199         | 100%        | 9e-60   | 99.00%     | 1510     | <a href="#">CAD39093.1</a>     |
| ✓ FLJ00043 protein (Homo sapiens)                                     | <a href="#">Homo sapiens</a> | 184       | 184         | 92%         | 2e-54   | 98.91%     | 1415     | <a href="#">BAB15741.1</a>     |
| ✓ unknown (Homo sapiens)                                              | <a href="#">Homo sapiens</a> | 104       | 104         | 85%         | 2e-28   | 56.98%     | 211      | <a href="#">AAX82024.1</a>     |
| ✓ unnamed protein product (Homo sapiens)                              | <a href="#">Homo sapiens</a> | 104       | 104         | 85%         | 1e-27   | 56.98%     | 310      | <a href="#">BAA91391.1</a>     |
| ✓ EH domain-binding protein 1 isoform 3 (Homo sapiens)                | <a href="#">Homo sapiens</a> | 104       | 104         | 85%         | 2e-26   | 56.98%     | 1160     | <a href="#">NP_001136087.1</a> |
| ✓ EH domain-binding protein 1 isoform 5 (Homo sapiens)                | <a href="#">Homo sapiens</a> | 104       | 104         | 85%         | 2e-26   | 56.98%     | 1195     | <a href="#">NP_001341146.1</a> |
| ✓ EH domain-binding protein 1 isoform 8 (Homo sapiens)                | <a href="#">Homo sapiens</a> | 104       | 104         | 85%         | 2e-26   | 56.98%     | 878      | <a href="#">NP_001341151.1</a> |
| ✓ EH domain-binding protein 1 isoform 6 (Homo sapiens)                | <a href="#">Homo sapiens</a> | 104       | 104         | 85%         | 2e-26   | 56.98%     | 1159     | <a href="#">NP_001341148.1</a> |
| ✓ unnamed protein product (Homo sapiens)                              | <a href="#">Homo sapiens</a> | 104       | 104         | 85%         | 2e-26   | 56.98%     | 1160     | <a href="#">BAE85234.1</a>     |
| ✓ EH domain-binding protein 1 isoform 1 (Homo sapiens)                | <a href="#">Homo sapiens</a> | 104       | 104         | 85%         | 2e-26   | 56.98%     | 1231     | <a href="#">NP_001341141.1</a> |
| ✓ EH domain-binding protein 1 isoform 2 (Homo sapiens)                | <a href="#">Homo sapiens</a> | 104       | 104         | 85%         | 2e-26   | 56.98%     | 1196     | <a href="#">NP_001136086.1</a> |
| ✓ EH domain-binding protein 1 isoform 4 (Homo sapiens)                | <a href="#">Homo sapiens</a> | 104       | 104         | 85%         | 2e-26   | 56.98%     | 1230     | <a href="#">NP_001341144.1</a> |
| ✓ EH domain-binding protein 1 isoform 7 (Homo sapiens)                | <a href="#">Homo sapiens</a> | 104       | 104         | 85%         | 2e-26   | 56.98%     | 949      | <a href="#">NP_001341150.1</a> |
| ✓ NPF/calponin-like protein (Homo sapiens)                            | <a href="#">Homo sapiens</a> | 103       | 103         | 85%         | 5e-26   | 55.81%     | 1231     | <a href="#">AAG97141.1</a>     |

Figure S1. Blast analysis, obtained using the protein BLAST tool of NCBI website, of sequence similarity of the peptide used by Biorbyt to produce EHBP1L1 antibody (A) with rat (B) and human (C) proteome sequence. The peptide, which is KLH conjugated synthetic peptide derived from human EHBP1L1:101-200/1523, has 91% of similarity with rat EHBP1L1 isoforms and 58% of similarity with EHBP1. Similarly, the peptide has 100% of identity with human EHBP1L1 isoforms and 57% of similarity with EHBP1.
